# Supplementary material
Source: PubMed Central journal article supplement (PMC7266723)
Supplement: NIHMS1579426-supplement-1.pdf [file NIHMS1579426-supplement-1.pdf]

# Supplemental Figures

# Supplemental Figure 1.

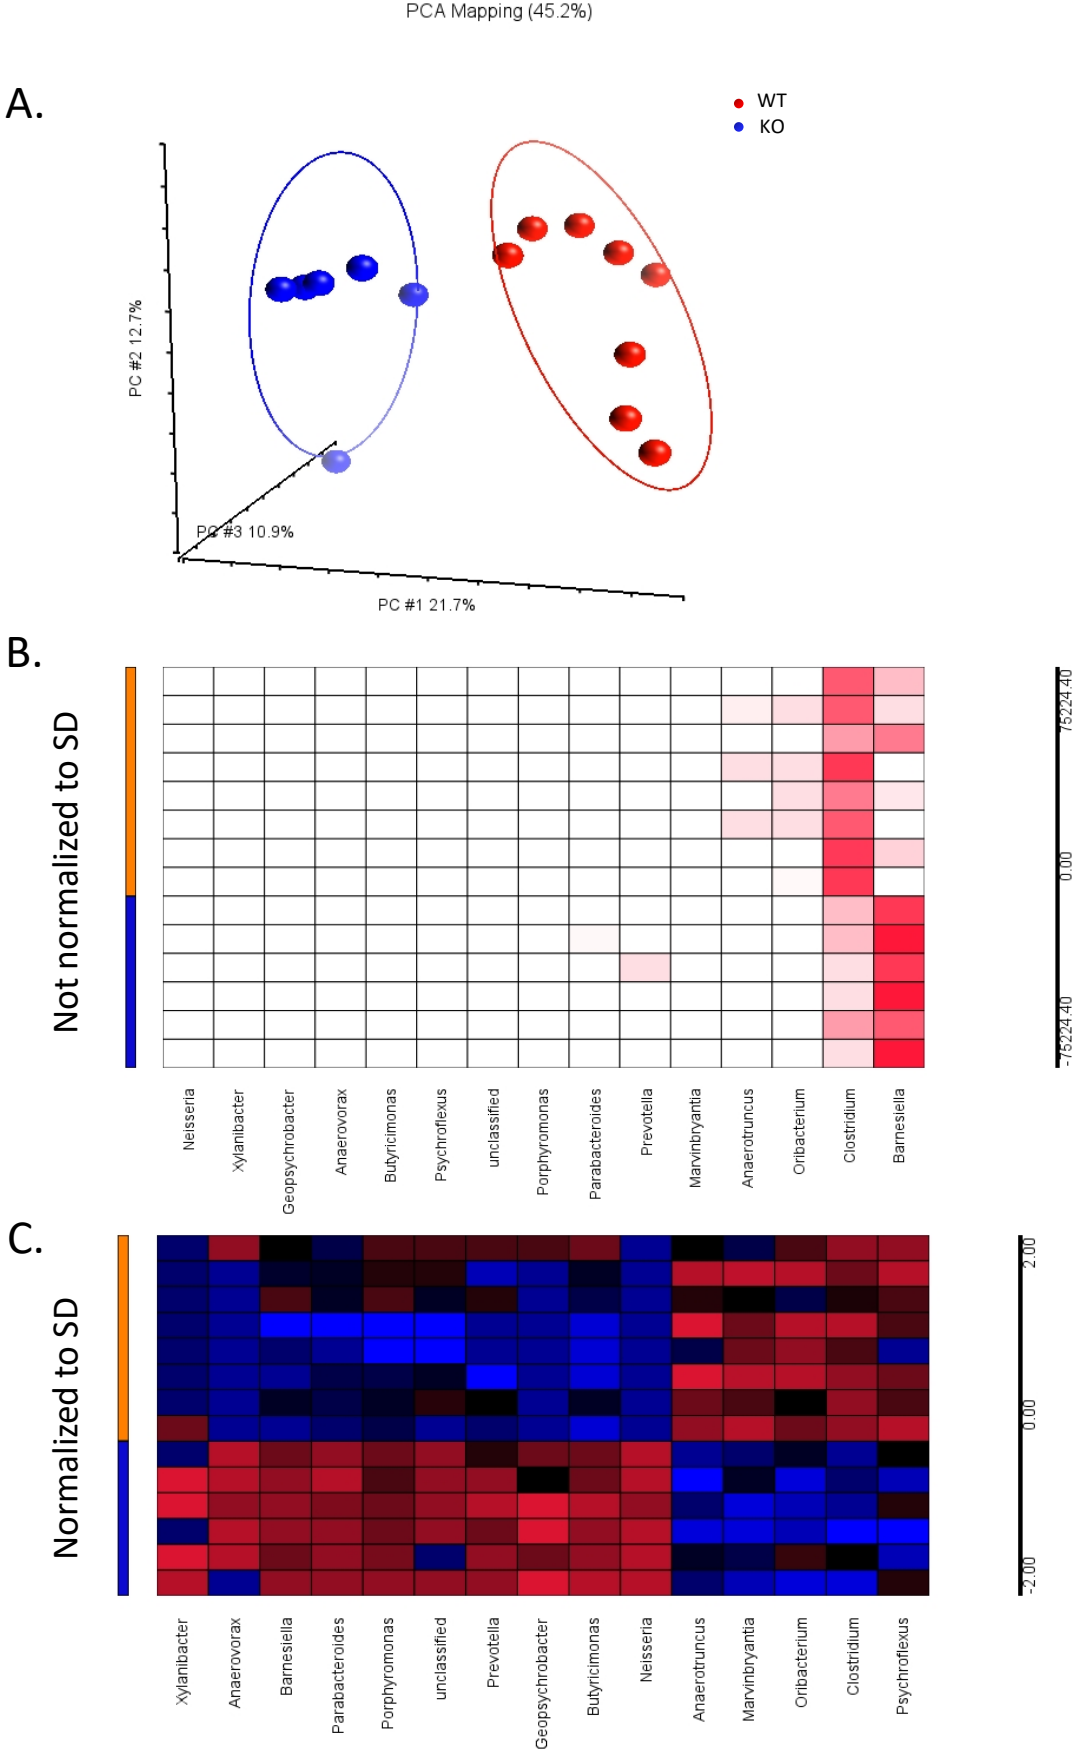

D.

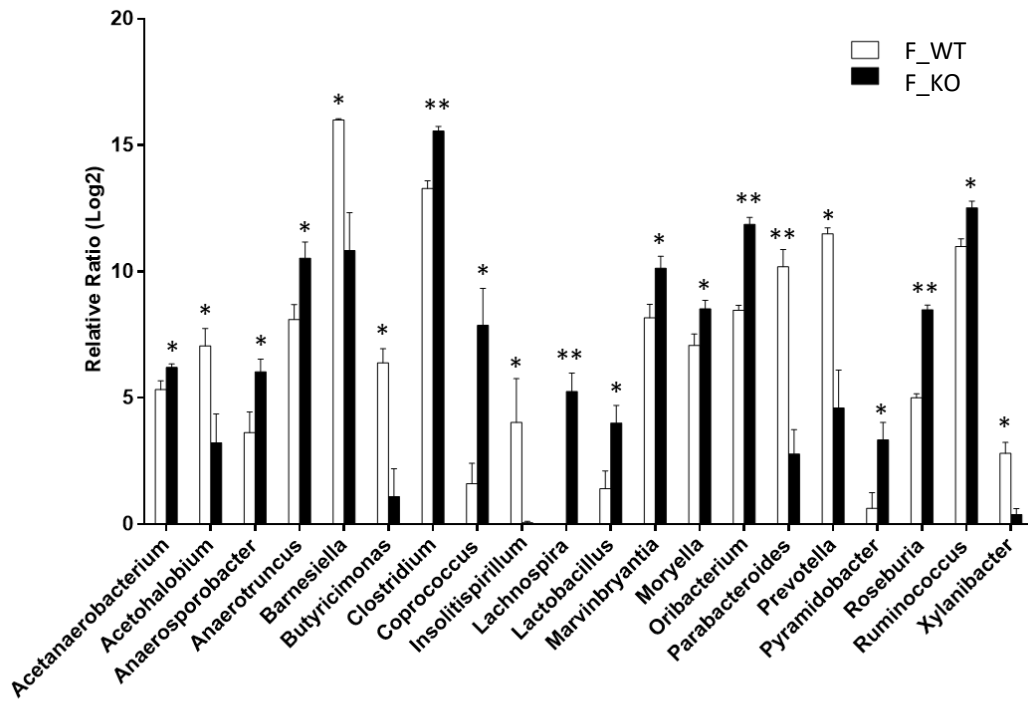

E.

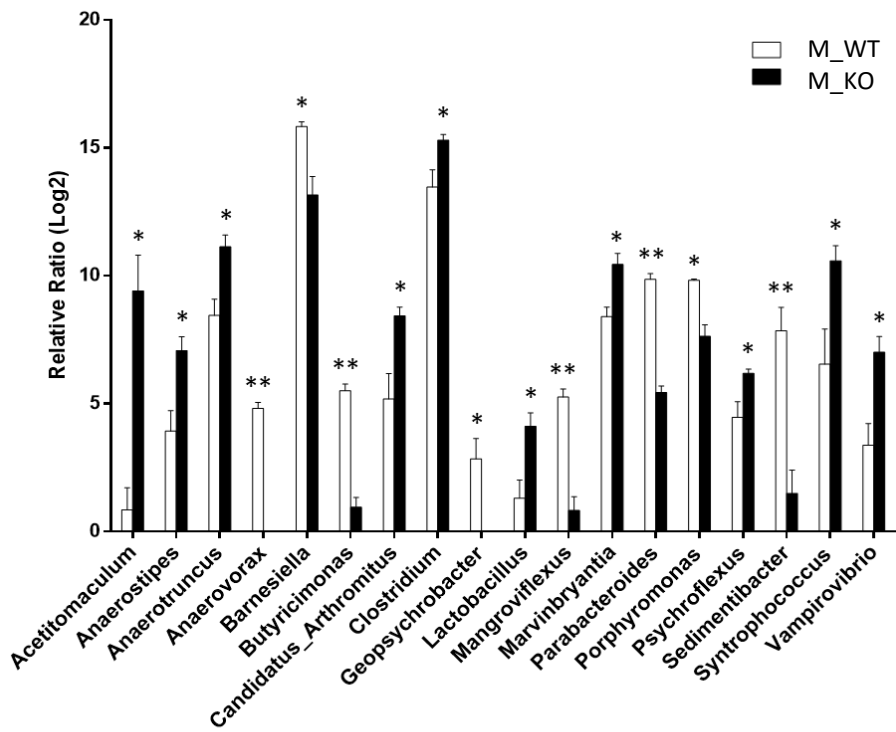

# Supplemental Figure 2.

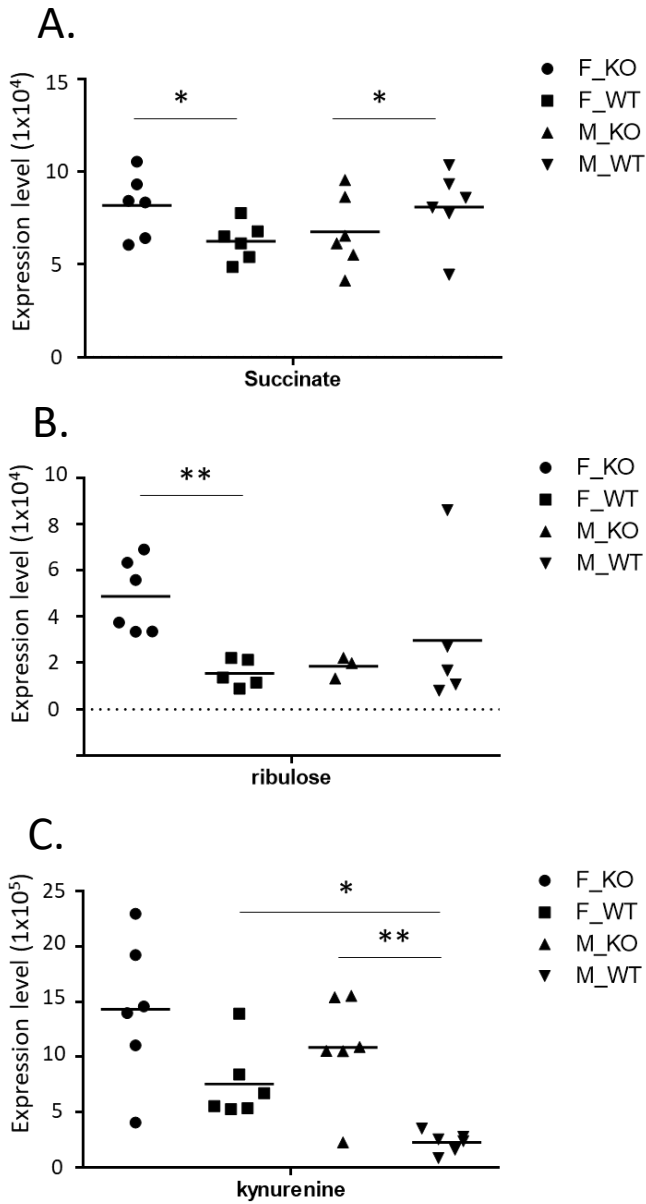

**D.**

Female\_KO

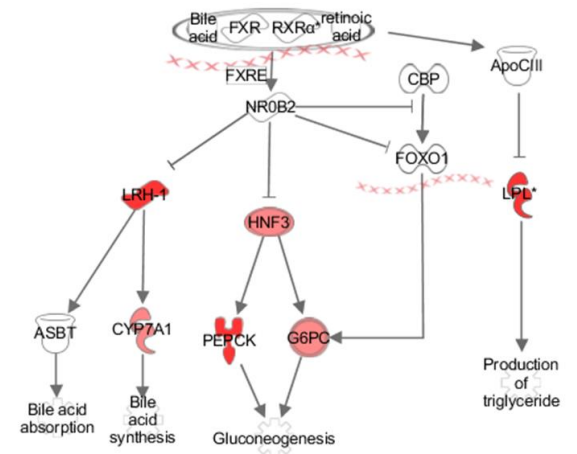

Male\_KO

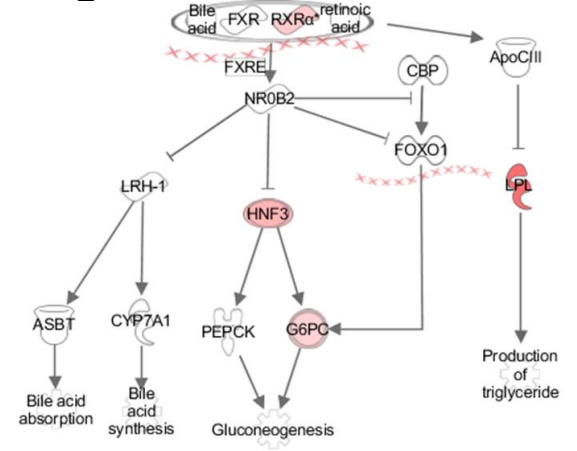

Supplemental Figure 3.

A.

Spleen

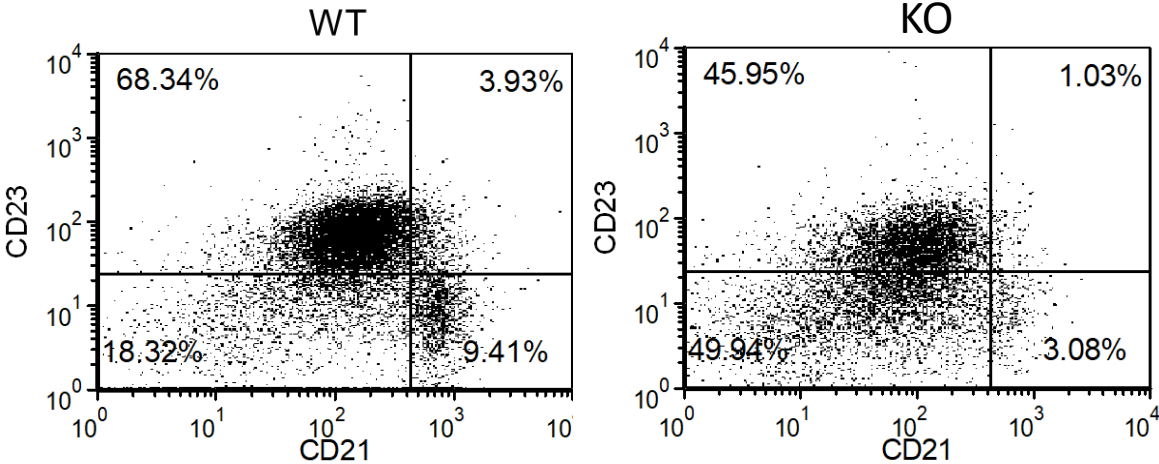

B.

Thymus

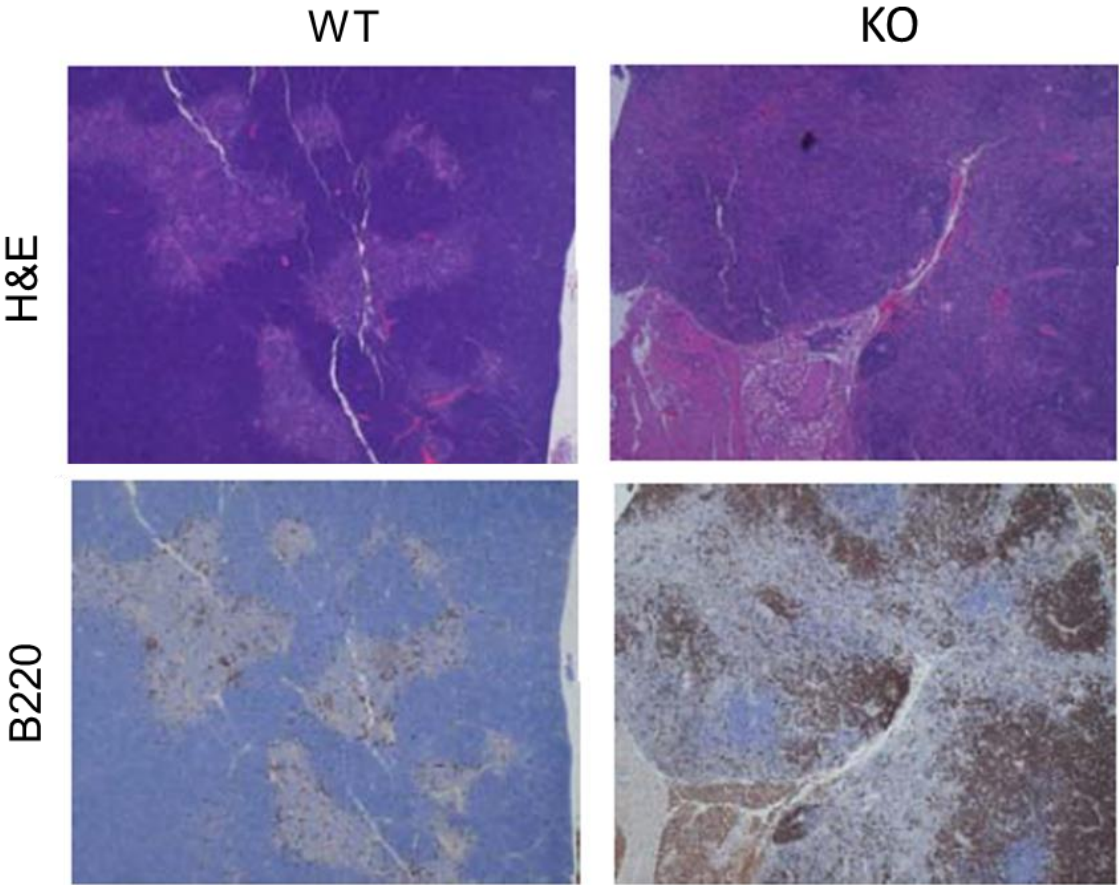

# Supplemental Figure 4.

3wks 6wks 12wks

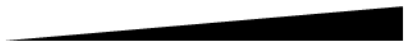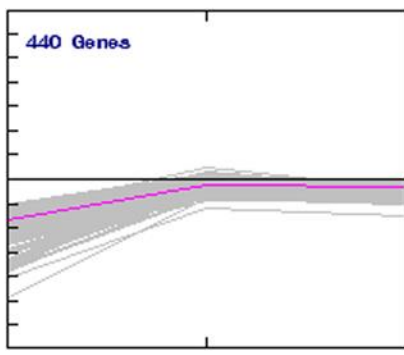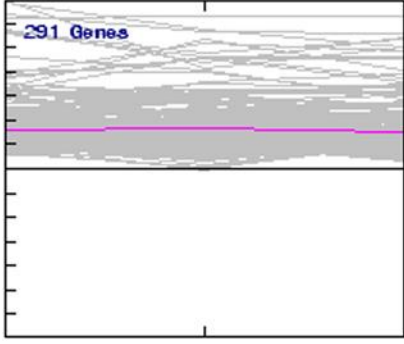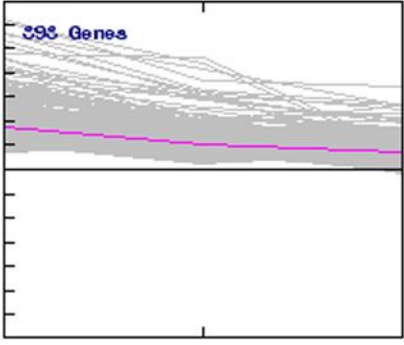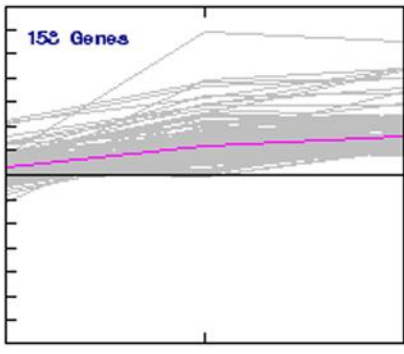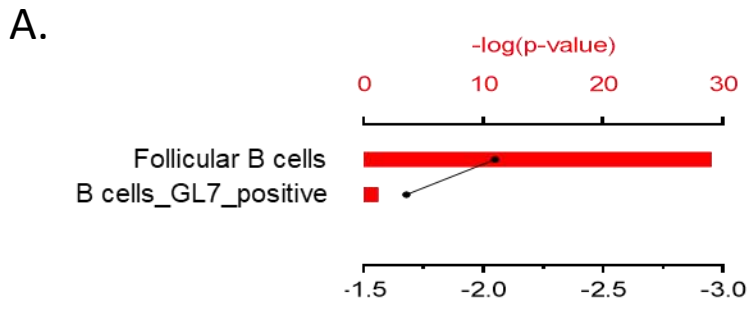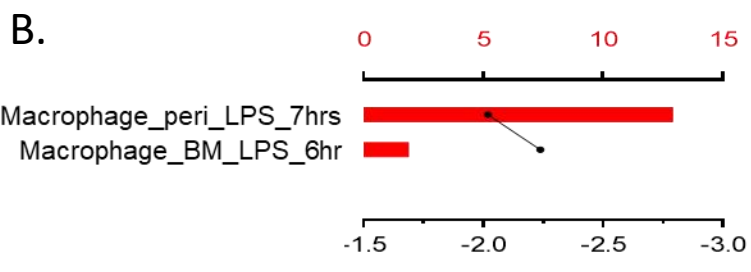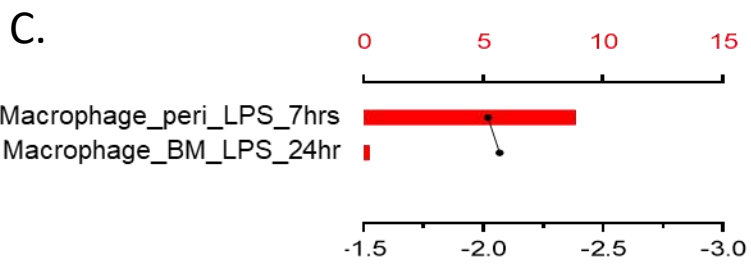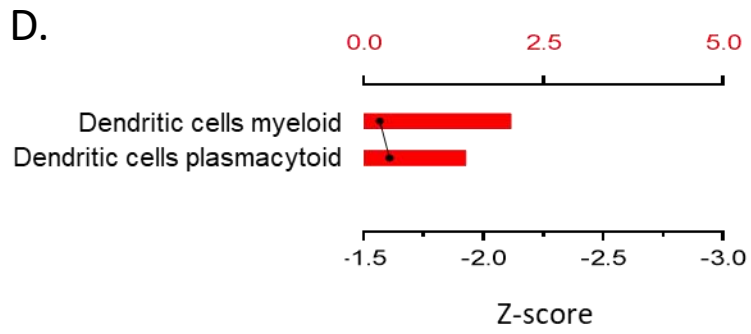

KO vs WT

# Supplemental Figure 5.

## A. Phagosome formation

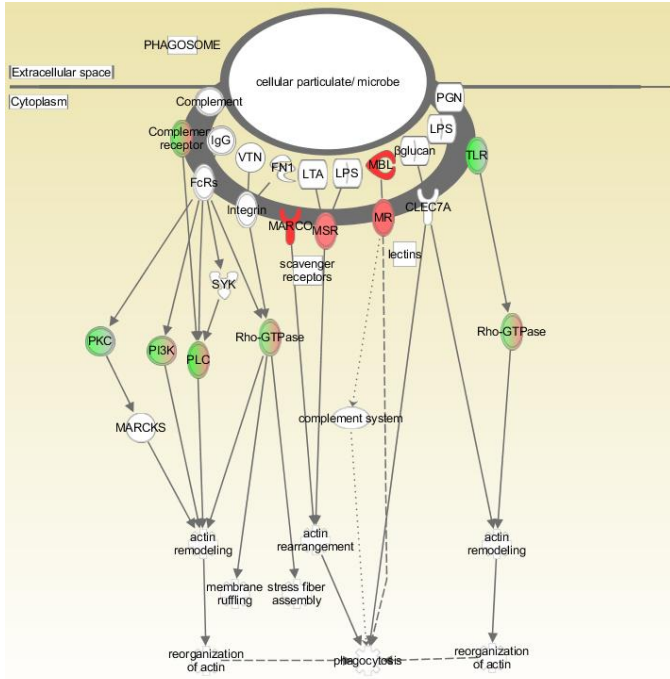

## B. Phagosome maturation

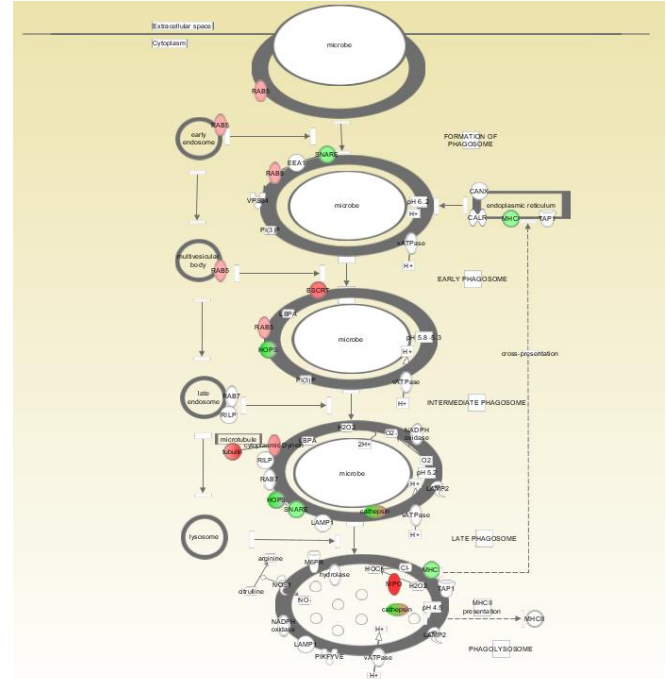

## C. Oxidative phosphorylation

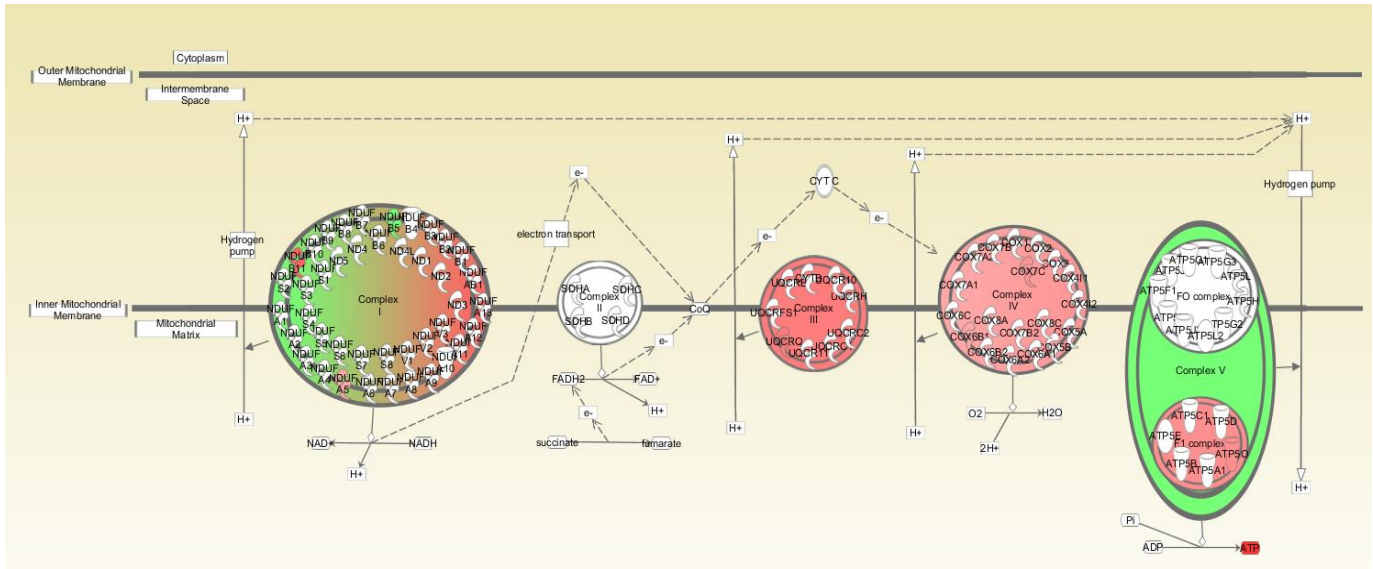

# Supplemental Figure 6.

## A. Systemic Level

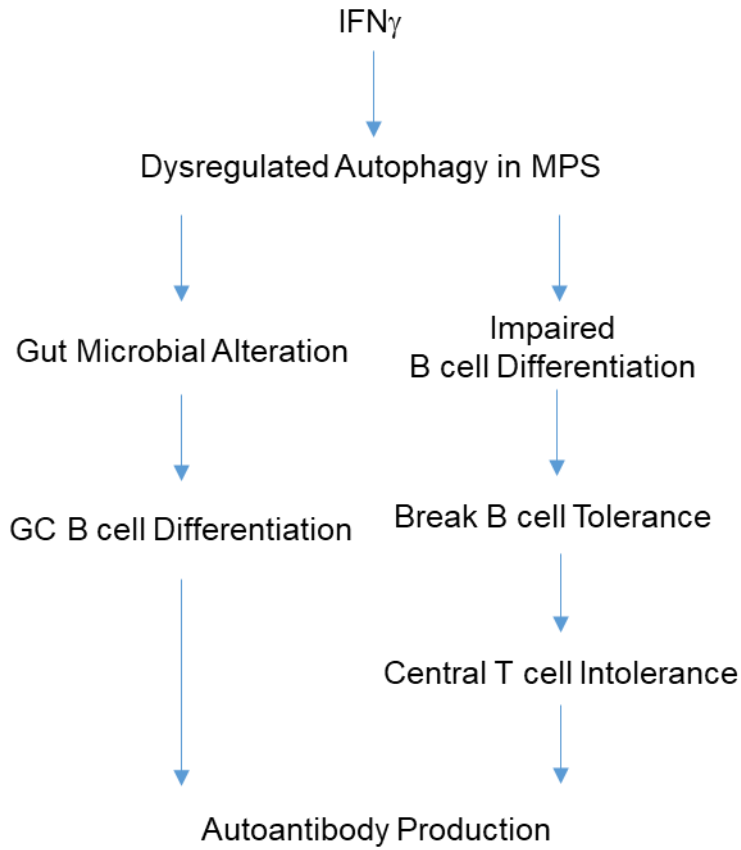

MPS: Mononuclear phagocyte system

## B. Cellular Level

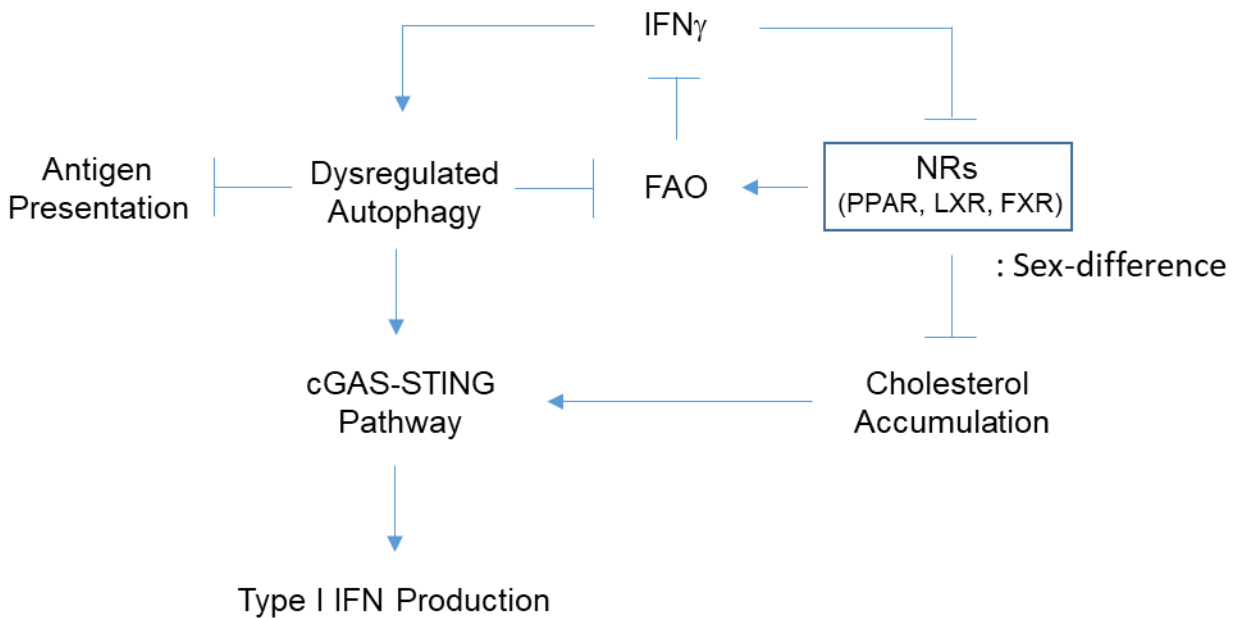



# Supplemental Table 1.

| miRNA ID        | miRNA_12wks<br>(Fold Change) | Gene Symbol | Thymus_12wk<br>(Fold Change) |
|-----------------|------------------------------|-------------|------------------------------|
| mmu-let-7a      | -2.645                       | CCL7        | 6.622                        |
| mmu-let-7a      | -2.645                       | CHST3       | 5.313                        |
| mmu-let-7a      | -2.645                       | HMOX1       | 2.531                        |
| mmu-let-7a      | -2.645                       | IL10        | 6.863                        |
| mmu-let-7a      | -2.645                       | MSR1        | 5.28                         |
| mmu-let-7a      | -2.645                       | POU2F2      | 4.792                        |
| mmu-miR-1       | -2.102                       | NR1H3       | 3.211                        |
| mmu-miR-1       | -2.102                       | NRP2        | 2.655                        |
| mmu-miR-101a    | 1.352                        | CAV3        | 4.681                        |
| mmu-miR-101a    | 1.352                        | MYO1E       | 3.182                        |
| mmu-miR-101a    | 1.352                        | RAC1        | 7.69                         |
| mmu-miR-107     | -1.608                       | FIGF        | 2.494                        |
| mmu-miR-107     | -1.608                       | PIK3AP1     | 7.107                        |
| mmu-miR-1197    | 1.02                         | FCER1G      | 5.403                        |
| mmu-miR-122     | 1.257                        | NOD2        | 3.233                        |
| mmu-miR-122     | 1.257                        | OCLN        | 2.492                        |
| mmu-miR-1224    | -1.621                       | CXCL6       | 5.676                        |
| mmu-miR-124     | -1.602                       | GNG2        | 2.646                        |
| mmu-miR-124     | -1.602                       | PTPRJ       | 2.45                         |
| mmu-miR-125a-3p | -1.736                       | CCL4        | 14.957                       |
| mmu-miR-125a-3p | -1.736                       | LAIR1       | 2.727                        |
| mmu-miR-125a-5p | -1.635                       | CCR5        | 17.619                       |
| mmu-miR-125a-5p | -1.635                       | CXCL13      | 8.734                        |
| mmu-miR-125a-5p | -1.635                       | MYO7A       | 2.433                        |
| mmu-miR-138     | -1.179                       | CYBB        | 5.923                        |
| mmu-miR-138     | -1.179                       | SDC3        | 3.352                        |
| mmu-miR-138     | -1.179                       | SH2D1B      | 13.466                       |
| mmu-miR-140     | -1.426                       | C1R         | 3.587                        |
| mmu-miR-142-3p  | -1.322                       | TNFRSF13C   | 6.189                        |
| mmu-miR-145     | -2.446                       | SIRPA       | 4.251                        |
| mmu-miR-146a    | -1.433                       | NOS2        | 3.981                        |
| mmu-miR-146a    | -1.433                       | STAT1       | 2.921                        |
| mmu-miR-146a    | -1.433                       | TLR1        | 8.109                        |
| mmu-miR-147     | -1.836                       | BTK         | 4.865                        |
| mmu-miR-149     | -1.819                       | CD72        | 7.539                        |
| mmu-miR-149     | -1.819                       | FCGR3A      | 118.674                      |
| mmu-miR-150     | -1.043                       | ITGAX       | 6.901                        |
| mmu-miR-152     | -1.613                       | HLA-A       | 2.754                        |
| mmu-miR-155     | -1.276                       | LAT2        | 4.083                        |
| mmu-miR-16      | -1.884                       | CXCL10      | 4.475                        |
| mmu-miR-16      | -1.884                       | IL10RA      | 2.855                        |
| mmu-miR-16      | -1.884                       | TNFSF13B    | 5.704                        |
| mmu-miR-181a    | -1.599                       | IL2         | 2.828                        |
| mmu-miR-185     | -1.884                       | LYN         | 5.492                        |
| mmu-miR-188-3p  | 1.222                        | PAX5        | 4.833                        |
| mmu-miR-1900    | -1.928                       | TLR6        | 3.687                        |
| mmu-miR-192     | -1.177                       | CXCR5       | 6.062                        |
| mmu-miR-1962    | -1.21                        | CD79A       | 6.327                        |
| mmu-miR-1962    | -1.21                        | OAS1        | 3.741                        |
| mmu-miR-1962    | -1.21                        | TGM2        | 2.816                        |
| mmu-miR-200a    | -2.071                       | HCAR2       | 6.055                        |
| mmu-miR-214     | -1.969                       | F8          | 2.142                        |
| mmu-miR-219     | -1.572                       | IL12B       | 4.156                        |
| mmu-miR-219     | -1.572                       | PLCG2       | 3.106                        |
| mmu-miR-22      | -1.248                       | TLR8        | 4.983                        |
| mmu-miR-222     | -1.95                        | C6          | 4.59                         |
| mmu-miR-224     | -1.573                       | PTX3        | 4.062                        |
| mmu-miR-24      | -1.218                       | IFNG        | 24.122                       |
| mmu-miR-2861    | -1.042                       | GSTT1       | 4.711                        |
| mmu-miR-296-5p  | -1.029                       | CD22        | 4.442                        |
| mmu-miR-29b     | -1.407                       | Tpm1        | 5.305                        |
| mmu-miR-301b    | -1.494                       | TBXAS1      | 4.493                        |
| mmu-miR-3072    | -1.181                       | BLVRB       | 2.75                         |
| mmu-miR-3072    | -1.181                       | NLRC5       | 2.884                        |
| mmu-miR-31      | -1.517                       | FCGR1A      | 7.535                        |
| mmu-miR-324-5p  | 1.037                        | CCL13       | 6.789                        |
| mmu-miR-370     | -1.153                       | FARP2       | 2.277                        |
| mmu-miR-495     | -1.406                       | NOD1        | 3.471                        |
| mmu-miR-668     | 1.403                        | PLA2G2D     | 5.048                        |
| mmu-miR-671-5p  | 1.082                        | C1QA        | 5.771                        |
| mmu-miR-744     | -1.511                       | PLD4        | 6.227                        |
| mmu-miR-758     | -1.138                       | TLR7        | 3.348                        |
| mmu-miR-876-5p  | -1.302                       | MYL2        | 8.992                        |
